# Supplementary material for: Imprinting bulk amorphous alloy at room temperature
Source: PubMed Central journal article supplement (PMC4643295; doi:10.1038/srep16540), 2015-11-13

## Imprinting bulk amorphous alloy at room temperature

Song-Yi Kim<sup>1</sup>, Eun-Soo Park<sup>2</sup>, Ryan T. Ott<sup>3</sup>, Thomas A. Lograsso<sup>3</sup>, Moo-Young Huh<sup>4</sup>, Do-Hyang Kim<sup>5</sup>, Jürgen Eckert<sup>6,7</sup> & Min-Ha Lee<sup>1\*</sup>

<sup>1</sup> Rare Metals R&D Group, Korea Institute of Industrial Technology, Incheon 406-840, Korea

<sup>2</sup> Global Technology Center, Samsung Electronics Co., Ltd., Suwon, 443-742, Korea

<sup>3</sup> Division of Materials Sciences and Engineering, Ames Laboratory (USDOE), Ames, Iowa 50011, USA

<sup>4</sup> Department of Materials Science and Engineering, Korea University, Seoul, 136-701, Korea

<sup>5</sup> Department of Metallurgical Engineering, Yonsei University, Seoul, 120-749, Korea

<sup>6</sup> IFW Dresden, Institute for Complex Materials, P.O. Box 27 01 16, D-01171 Dresden, Germany

<sup>7</sup> TU Dresden, Institute of Materials Science, D-01062 Dresden, Germany

### Supplement 1

FEM simulation analysis on the effective strain effect by strain rate changing on the formation of shear band in metallic glass during the patterning process. Shear strain rate plays a key role to decide shear banding or homogeneous flow during deformation rather than effective strain.

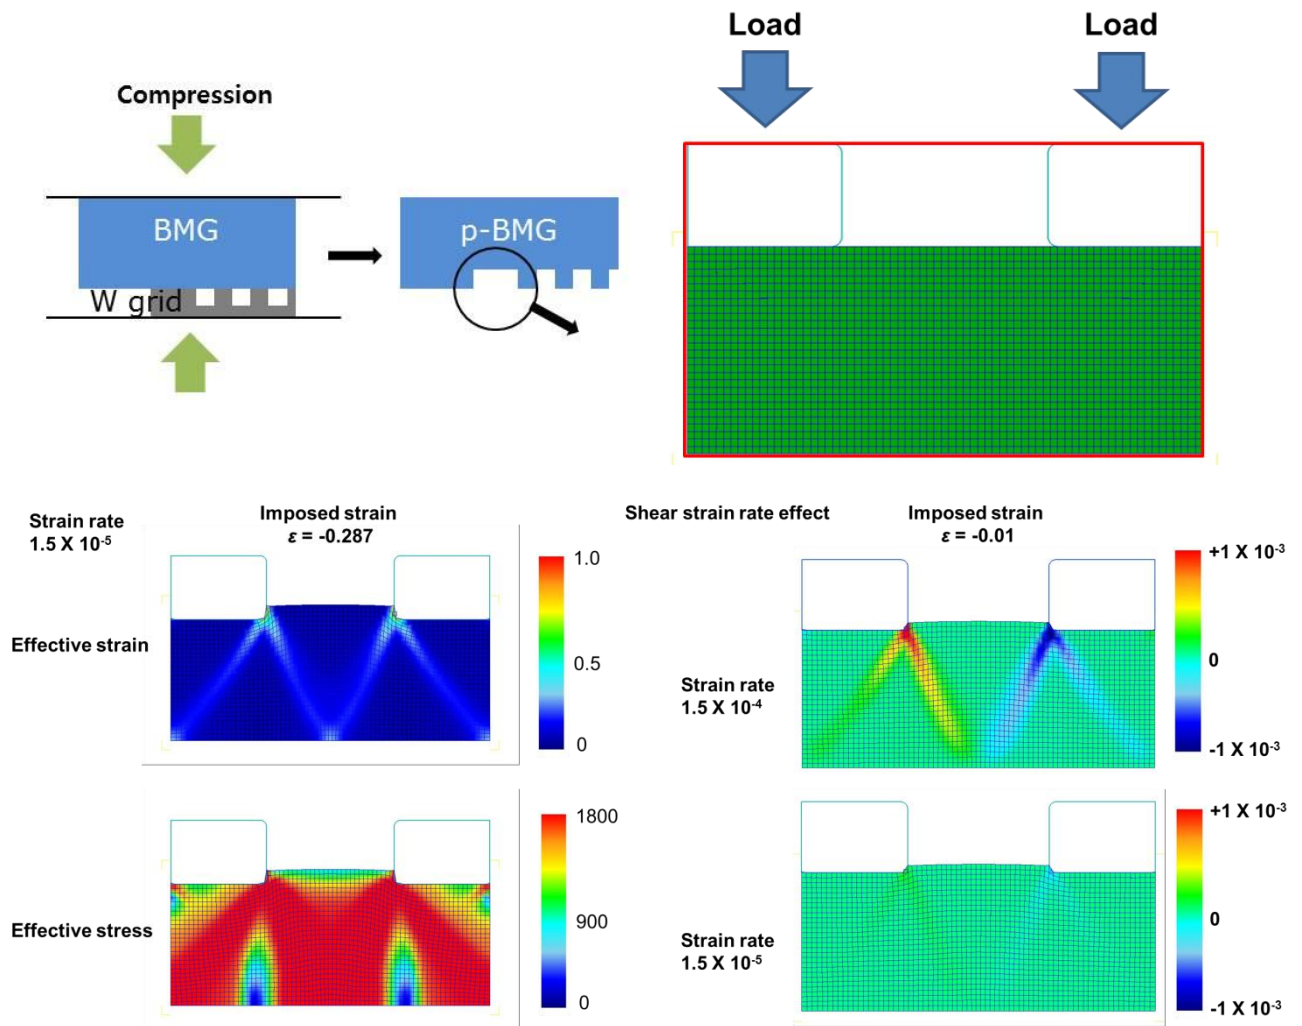

Supplement: srep16540-s1.pdf [file srep16540-s1.pdf]
